# Supplementary material for: Somatic LKB1 Mutations Promote Cervical Cancer Progression
Source: PubMed Central journal article supplement (PMC2660434; doi:10.1371/journal.pone.0005137), 2009-04-02
Supplement: pone.0005137.s001.pdf [file pone.0005137.s001.pdf]

ATCGGATTATTTGCAGCGGATCCTACACGTCCCCTCCTCCTGCCTCTTGCCCTGCGCTCCCGAAG  
GGCCTCCGGACCCGGAGGATCTCACCGCGGGGCGGGGTCCACGGCGAGGGGGCTCGGCCAAGCG  
GGCAGCCTCGCGCACGCGCACTCAACCCGGACGCGGGCCTCTCCGCCGAGCCCGCGCCCGCCAC  
CTGGCGGCCACAGCGGTCCGCGCAGACCGCCGGCCCTTTTCTATCCGCGACCGGATACTGGCA  
GGGTCTAGGAAAGACCCCTCTGGCTGCTGCGGGGCCAGTGCCTGCGAGGCTCGACCCCACTCC  
ATTGCGTGGGGGGGCTGAGCTAGGTCCGTGAAGCGGGGC*GGTTGCGATCAAGGCCCGAC*TTTTT  
TTTTTTTTTTTTTTTTTTTTTTTTTTTTTGGAGACGGAGTCTCGCTCTGTGCGCCAGGCCGGACTGCGGA  
CTGCAGTGGCGCCATCTCGGCGCACTGCAACCTCTACCTCCCGGGTTCAAGCGATTCTCCTGCCT  
CAGCCTCCCGAGTAGCTGGGACTACAGGCGCCCGCCACCGCGCCCGGCTAATTTTTTGTATTTTT  
AGTAGAGACGGGGTTTACCGTGTTAGCCAGGATGGTCTCAAACCTCCTGACCTCGTGATCCGCCT  
GCCTCAGCCTCCCAAAGTGCTGGGATTACAGGCATGAGCTACCACGCCCGGCCTTGTAAGGCC  
AAGTTTTTAAAAACAGTTTTTGGGGTCCCC*CATGTGTGGCATCCACAGGCAGGGCTGCTGCCAACC*  
TCCCGCCTCCATCTTTGCTGGGCCTGCTGCCTGAGGCCAGTGGCCTGCTTCCAGCCCATCGCTGG  
CAGCCGCCTGCCCTGACCAGATCTCCTGGATGCAGGTCTGTGGCCTCAGAGTCAGGGCCCCTTGC  
TGCTGCAGGACCACAGGGGCAGGGAGGGGCCTGCTGTTCCAGCAAGACTTTGGGGTGCAGCCGGC  
(974 bp shown)

Figure S1
