# Supplementary material for: Somatic LKB1 Mutations Promote Cervical Cancer Progression
Source: PubMed Central journal article supplement (PMC2660434; doi:10.1371/journal.pone.0005137), 2009-04-02
Supplement: pone.0005137.s002.pdf [file pone.0005137.s002.pdf]

**Table S1. Complete list of *LKB1* mutations detected by sequencing or MLPA\*.**

**Primary Tumors**

| Case ID           | Stage | Histology             | Sequencing Mutation(s)                                            | MLPA (Copy Number Alterations)                | Comment                                            |
|-------------------|-------|-----------------------|-------------------------------------------------------------------|-----------------------------------------------|----------------------------------------------------|
| 23                | IIB   | Adenosquamous         | <i>c.1171C&gt;A (p.Ser19X)</i><br><i>c.1132C&gt;A (p.Pro6Gln)</i> |                                               | Nonsense + missense mutation                       |
| 75                | IIB   | Squamous              | <i>c.1284G&gt;T (p.Glu57X)</i>                                    | -                                             | Nonsense mutation                                  |
| 41                | IIIB  | Squamous              | <i>c.1406-11_1420delCTCTGTCCCAGGG</i><br><i>AAATTCAACTACT</i>     | Single copy loss 0.9M5'-10M3'                 | 26 bp deletion intron/exon boundary and frameshift |
| 51                | IIB   | Squamous              | <i>c.1435A&gt;G (p.His107Arg)</i>                                 | -                                             | Kinase domain, phylogenetically conserved          |
| 19                | IB    | Adenocarcinoma        | <i>c.1994_1995insA (p.Pro294fs)</i>                               | -                                             | Frameshift and premature termination               |
| 14                | IIA   | Adenocarcinoma        | <i>c.2009C&gt;A (p.Phe298Leu)</i> (homozygous)                    | -                                             | Kinase domain, phylogenetically conserved          |
| 16                | IB2   | Adenocarcinoma        | <i>c.2025C&gt;T (p.Arg304Trp)</i>                                 | -                                             | Known kinase-dead PJS mutation                     |
| 20                | IB2   | Adenocarcinoma (MDA)* | <i>c.2025C&gt;T (p.Arg304Trp)</i>                                 | -                                             | Known kinase-dead PJS mutation                     |
| 13                | IIIB  | Adenocarcinoma        |                                                                   | Single copy loss P1-E1                        |                                                    |
| 22                | IB2   | Adenocarcinoma        |                                                                   | Two copy loss 0.6M5'-E10                      |                                                    |
| 30                | IB2   | Squamous              | -                                                                 | Single copy loss P1-E1                        |                                                    |
| 48                | IIIB  | Squamous              | -                                                                 | Single copy loss 0.9M5'-10M3'                 |                                                    |
| 50                | IIB   | Squamous              | -                                                                 | Two copy copy loss 0.6M5'-E10                 |                                                    |
| 60                | IIB   | Squamous              | -                                                                 | Two copy loss 0.6M5'-E10                      |                                                    |
| 62                | IIB   | Squamous              | -                                                                 | Two copy loss P1-E10                          |                                                    |
| 72                | IB2   | Squamous              | -                                                                 | One copy loss P1-E10                          |                                                    |
| 85                | IB1   | Squamous              | -                                                                 | Two copy loss P1-E1, one copy loss 0.9M5'-E10 |                                                    |
| <b>Cell Lines</b> |       |                       |                                                                   |                                               |                                                    |
| C4I               | -     | Squamous              | <i>c.1762C&gt;T (p.Ser216Phe)</i> (homozygous)                    | Single copy loss P1-E10                       |                                                    |
| HeLa              | -     | Adenocarcinoma        | -                                                                 | Two copy loss P1-E3                           |                                                    |
| HeLaS3            | -     | Adenocarcinoma        | -                                                                 | Two copy loss P1-E3                           |                                                    |
| MS751             | -     | Squamous              | -                                                                 | Two copy loss E2-E10                          |                                                    |
| SiHa              | -     | Squamous              | -                                                                 | Two copy loss 0.65M5'-E10                     |                                                    |
| HT3               | -     | Squamous              | -                                                                 | Two copy loss P1-E1                           |                                                    |

\*MDA = minimal deviation adenocarcinoma
